# Supplementary material for: Macromitophagy is a longevity assurance process that in chronologically aging yeast limited in calorie supply sustains functional mitochondria and maintains cellular lipid homeostasis
Source: publisher site journal article supplement (doi:10.18632/aging.100547), 2013-03-30
Supplement: Supplementary file [file aging-v5i4-100547-supplementary-material-SD1.pdf]

SUPPLEMENTAL DATA

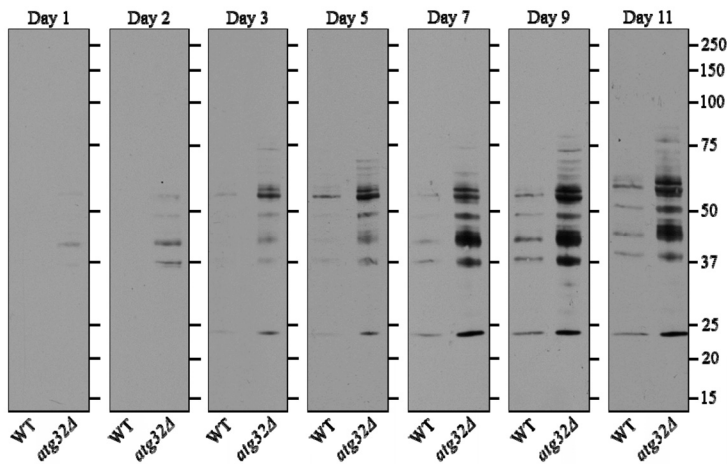

**Figure S1. Under CR conditions, the *atg32Δ* mutation elevates the extent of oxidative damage to mitochondrial proteins.** WT and *atg32Δ* strains were cultured in the nutrient-rich YP medium initially containing 0.2% glucose. Immunodetection of carbonyl groups in oxidatively damaged proteins of purified mitochondria was performed as described in Methods.

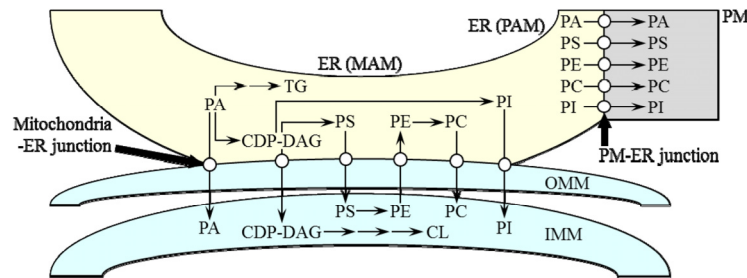

**Figure S2. Lipid synthesis in the ER and mitochondria and lipid transport via mitochondria-ER and PM-ER junctions.** After being synthesized in the mitochondria-associated membrane (MAM) domain of the ER, cytidine diphosphate-diacylglycerol (CDP-DAG) and phosphatidylserine (PS) are transported via mitochondria-ER junctions to the outer mitochondrial membrane (OMM). Following their translocation from the OMM to the inner mitochondrial membrane (IMM), CDP-DAG and PS are used as substrates for the synthesis of cardiolipin (CL) and phosphatidylethanolamine (PE), respectively. PE is then transported through mitochondria-ER junctions to the MAM domain of the ER, where it is converted to phosphatidylcholine (PC). After being formed in the MAM, PC is translocated via mitochondria-ER junctions to mitochondria, which are incapable of synthesizing this glycerophospholipid. The glycerophospholipids phosphatidic acid (PA) and phosphatidylinositol (PI) are also synthesized in the MAM domain of the ER, from which they are delivered through mitochondria-ER junctions to mitochondria known to lack enzymes required for the synthesis of these two glycerophospholipids. After being synthesized within the ER and inner mitochondrial membranes, lipids can be translocated via the PM-ER junctions from the PM-associated membrane (PAM) domain of the ER to the plasma membrane (PM). Unlike glycerophospholipids, various molecular forms of the neutral lipids triacylglycerols (TG) cannot be moved from the site of their synthesis in the ER to either mitochondria or the PM. See text for details.

**Table S1.** List of individual protein components of digitonin-solubilized mitochondrial membrane protein supercomplexes separated by 1-D BN-PAGE, resolved by 2-D SDS-PAGE and stained by silver. Following silver staining, protein bands were excised from the gel, reduced, alkylated and in-gel digested with trypsin. The resulting peptides were separated by RP-HPLC/MS using an LTQ Orbitrap. The raw MS data file obtained by Xcalibur was analyzed using the Thermo Scientific Xcalibur Proteome Discoverer application (version 1.3), which was used to identify individual protein components of the isolated mitochondrial respiratory supercomplexes by comparing the raw data of mass spectra of digested fragments to the mass spectra of peptides within the Uniprot FASTA database. The analysis by the Thermo Scientific Xcalibur Proteome Discoverer coupled to the FASTA database was enabled by using the peak-finding search engine SEQUEST, which processes MS data using a peak-finding algorithm to search the raw data for generating a peak probability list with relative protein abundances.

| Protein name                  | Protein description                                                                     | NCBI accession number | Score  | Sequence coverage (%) | Number of identified peptides | MW (kDa) | Calculated pI |
|-------------------------------|-----------------------------------------------------------------------------------------|-----------------------|--------|-----------------------|-------------------------------|----------|---------------|
| <b>Wild-type strain</b>       |                                                                                         |                       |        |                       |                               |          |               |
| <b>Protein supercomplex 1</b> |                                                                                         |                       |        |                       |                               |          |               |
| Aac2p                         | Major ADP/ATP carrier of the mitochondrial inner membrane                               | P18239                | 103.33 | 30.19%                | 10                            | 34.4     | 9.79          |
| Por1p                         | Mitochondrial porin (voltage-dependent anion channel)                                   | P04840                | 251.47 | 43.46%                | 12                            | 30.4     | 7.93          |
| Ndi1p                         | NADH:ubiquinone oxidoreductase                                                          | P32340                | 177.99 | 35.67%                | 19                            | 57.2     | 9.44          |
| Nde1p                         | Mitochondrial external NADH dehydrogenase                                               | P40215                | 56.52  | 34.64%                | 25                            | 62.7     | 9.28          |
| Pda1p                         | E1 alpha subunit of the pyruvate dehydrogenase complex                                  | P16387                | 99.69  | 26.43%                | 15                            | 46.3     | 8.1           |
| Pdb1p                         | E1 beta subunit of the pyruvate dehydrogenase complex                                   | P32473                | 84.43  | 34.43%                | 9                             | 40       | 5.3           |
| Lat1p                         | Dihydrolipoamide acetyltransferase component (E2) of the pyruvate dehydrogenase complex | P12695                | 118.56 | 26.56%                | 11                            | 51.8     | 7.8           |
| Lpd1p                         | Dihydrolipoamide dehydrogenase component (E3) of the pyruvate dehydrogenase complex     | P09624                | 253.54 | 51.70%                | 27                            | 54       | 8.03          |

|       |                                                                                     |        |        |        |    |      |       |
|-------|-------------------------------------------------------------------------------------|--------|--------|--------|----|------|-------|
| Sdh1p | Flavoprotein subunit of succinate dehydrogenase (respiratory complex II)            | Q00711 | 112.55 | 38.59% | 24 | 70.2 | 7.5   |
| Sdh2p | Iron-sulfur subunit of succinate dehydrogenase (respiratory complex II)             | P21801 | 212.02 | 31.20% | 12 | 30.2 | 8.82  |
| Sdh3p | Cytochrome b subunit of succinate dehydrogenase (respiratory complex II)            | P33421 | 97.47  | 22.73% | 6  | 22.1 | 10.23 |
| Sdh4p | Membrane anchor subunit of succinate dehydrogenase (respiratory complex II)         | P37298 | 129.27 | 24.31% | 6  | 20.2 | 8.9   |
| Cyt1p | Cytochrome b-c1 complex (respiratory complex III), cytochrome c1 component          | P07143 | 49.94  | 27.83% | 5  | 34   | 8.12  |
| Qcr1p | Cytochrome b-c1 complex (respiratory complex III), subunit 1                        | P07256 | 154.4  | 32.82% | 19 | 50.2 | 7.3   |
| Qcr2p | Cytochrome b-c1 complex (respiratory complex III), subunit 2                        | P07257 | 188.18 | 54.62% | 26 | 40.5 | 7.96  |
| Qcr7p | Cytochrome b-c1 complex (respiratory complex III), subunit 7                        | P00128 | 106.36 | 22.83% | 5  | 14.6 | 5.88  |
| Qcr8p | Cytochrome b-c1 complex (respiratory complex III), subunit 8                        | P08525 | 92.45  | 24.47% | 3  | 11   | 9.7   |
| Rip1p | Cytochrome b-c1 complex (respiratory complex III), ubiquinol-cytochrome-c reductase | P08067 | 68.73  | 18.60% | 5  | 23.3 | 8.07  |

|                               |                                                                          |        |        |        |    |       |      |
|-------------------------------|--------------------------------------------------------------------------|--------|--------|--------|----|-------|------|
| Atp1p                         | Mitochondrial F1F0 ATP synthase (respiratory complex V), alpha subunit   | P07251 | 260.88 | 23.67% | 15 | 58.6  | 9.04 |
| Atp2p                         | Mitochondrial F1F0 ATP synthase (respiratory complex V), beta subunit    | P00830 | 270.34 | 38.94% | 20 | 54.8  | 5.71 |
| Atp3p                         | Mitochondrial F1F0 ATP synthase (respiratory complex V), gamma subunit   | P38077 | 207.02 | 47.91% | 20 | 34.3  | 9.31 |
| Atp4p                         | Mitochondrial F1F0 ATP synthase (respiratory complex V), b subunit       | P05626 | 135.52 | 55.74% | 18 | 26.9  | 9.13 |
| Atp5p                         | Mitochondrial F1F0 ATP synthase (respiratory complex V), subunit 5       | P09457 | 197.56 | 86.32% | 21 | 22.8  | 9.57 |
| Atp7p                         | Mitochondrial F1F0 ATP synthase (respiratory complex V), d subunit       | P30902 | 256.15 | 66.67% | 20 | 19.8  | 8.94 |
| Atp17p                        | Mitochondrial F1F0 ATP synthase (respiratory complex V), f subunit       | Q06405 | 91.74  | 41.58% | 5  | 11.3  | 10.1 |
| <b>Protein supercomplex 2</b> |                                                                          |        |        |        |    |       |      |
| Aac2p                         | Major ADP/ATP carrier of the mitochondrial inner membrane                | P18239 | 92.94  | 38.99% | 15 | 34.4  | 9.79 |
| Por1p                         | Mitochondrial porin (voltage-dependent anion channel)                    | P04840 | 199.73 | 39.22% | 10 | 30.4  | 7.93 |
| Kgd1p                         | Component of the mitochondrial alpha-ketoglutarate dehydrogenase complex | P20967 | 409.94 | 56.21% | 53 | 114.3 | 7.21 |

|                               |                                                                                     |        |        |        |    |      |      |
|-------------------------------|-------------------------------------------------------------------------------------|--------|--------|--------|----|------|------|
|                               | Cytochrome b-c1 complex (respiratory complex III), cytochrome c1 component          | P07143 | 35.71  | 27.83% | 5  | 34   | 8.12 |
| Qcr1p                         | Cytochrome b-c1 complex (respiratory complex III), subunit 1                        | P07256 | 636.69 | 36.32% | 20 | 50.2 | 7.3  |
| Qcr2p                         | Cytochrome b-c1 complex (respiratory complex III), subunit 2                        | P07257 | 248.78 | 67.12% | 33 | 40.5 | 7.96 |
| Qcr7p                         | Cytochrome b-c1 complex (respiratory complex III), subunit 7                        | P00128 | 122.57 | 22.83% | 5  | 14.6 | 5.88 |
| Qcr8p                         | Cytochrome b-c1 complex (respiratory complex III), subunit 8                        | P08525 | 26.43  | 24.47% | 4  | 11   | 9.7  |
| Rip1p                         | Cytochrome b-c1 complex (respiratory complex III), ubiquinol-cytochrome-c reductase | P08067 | 61.51  | 28.37% | 6  | 23.3 | 8.07 |
| <b>Protein supercomplex 3</b> |                                                                                     |        |        |        |    |      |      |
| Cyt1p                         | Cytochrome b-c1 complex (respiratory complex III), cytochrome c1 component          | P07143 | 40.02  | 22.98% | 6  | 34   | 8.12 |
| Qcr1p                         | Cytochrome b-c1 complex (respiratory complex III), subunit 1                        | P07256 | 124.86 | 34.14% | 17 | 50.2 | 7.3  |
| Qcr2p                         | Cytochrome b-c1 complex (respiratory complex III), subunit 2                        | P07257 | 156.88 | 57.61% | 25 | 40.5 | 7.96 |
| Qcr7p                         | Cytochrome b-c1 complex (respiratory complex III), subunit 7                        | P00128 | 142.84 | 51.97% | 7  | 14.6 | 5.88 |

|        |                                                                                     |        |        |        |    |      |      |
|--------|-------------------------------------------------------------------------------------|--------|--------|--------|----|------|------|
| Qcr8p  | Cytochrome b-c1 complex (respiratory complex III), subunit 8                        | P08525 | 40.05  | 24.47% | 4  | 11   | 9.7  |
| Rip1p  | Cytochrome b-c1 complex (respiratory complex III), ubiquinol-cytochrome-c reductase | P08067 | 54.99  | 25.58% | 6  | 23.3 | 8.07 |
| Atp1p  | Mitochondrial F1F0 ATP synthase (respiratory complex V), alpha subunit              | P07251 | 174.59 | 28.26% | 21 | 58.6 | 9.04 |
| Atp2p  | Mitochondrial F1F0 ATP synthase (respiratory complex V), beta subunit               | P00830 | 129.72 | 55.77% | 23 | 54.8 | 5.71 |
| Atp3p  | Mitochondrial F1F0 ATP synthase (respiratory complex V), gamma subunit              | P38077 | 143.47 | 32.80% | 12 | 34.3 | 9.31 |
| Atp4p  | Mitochondrial F1F0 ATP synthase (respiratory complex V), b subunit                  | P05626 | 254.25 | 50.82% | 14 | 26.9 | 9.13 |
| Atp5p  | Mitochondrial F1F0 ATP synthase (respiratory complex V), subunit 5                  | P09457 | 91.52  | 55.19% | 11 | 22.8 | 9.57 |
| Atp7p  | Mitochondrial F1F0 ATP synthase (respiratory complex V), d subunit                  | P30902 | 166.24 | 40.23% | 11 | 19.8 | 8.94 |
| Atp17p | Mitochondrial F1F0 ATP synthase (respiratory complex V), f subunit                  | Q06405 | 83.21  | 32.67% | 4  | 11.3 | 10.1 |

| Protein supercomplex 4 |                                                                                                                      |        |        |        |    |      |      |
|------------------------|----------------------------------------------------------------------------------------------------------------------|--------|--------|--------|----|------|------|
| Aac2p                  | Major ADP/ATP carrier of the mitochondrial inner membrane                                                            | P18239 | 92.83  | 29.25% | 10 | 34.4 | 9.79 |
| Atp1p                  | Mitochondrial F1F0 ATP synthase (respiratory complex V), alpha subunit                                               | P07251 | 255.88 | 28.07% | 22 | 58.6 | 9.04 |
| Atp2p                  | Mitochondrial F1F0 ATP synthase (respiratory complex V), beta subunit                                                | P00830 | 292.07 | 31.70% | 18 | 54.8 | 5.71 |
| Atp3p                  | Mitochondrial F1F0 ATP synthase (respiratory complex V), gamma subunit                                               | P38077 | 615.01 | 41.80% | 16 | 34.3 | 9.31 |
| Atp4p                  | Mitochondrial F1F0 ATP synthase (respiratory complex V), b subunit                                                   | P05626 | 90.24  | 40.57% | 12 | 26.9 | 9.13 |
| Atp5p                  | Mitochondrial F1F0 ATP synthase (respiratory complex V), subunit 5                                                   | P09457 | 225.76 | 66.51% | 12 | 22.8 | 9.57 |
| Atp7p                  | Mitochondrial F1F0 ATP synthase (respiratory complex V), d subunit                                                   | P30902 | 125.76 | 51.15% | 14 | 19.8 | 8.94 |
| Protein supercomplex 5 |                                                                                                                      |        |        |        |    |      |      |
| Yme2p                  | Integral inner mitochondrial membrane protein with a role in maintaining mitochondrial nucleoid structure and number | P32843 | 194.31 | 35.65% | 32 | 96.6 | 8.92 |
| Protein supercomplex 6 |                                                                                                                      |        |        |        |    |      |      |
| Aac2p                  | Major ADP/ATP carrier of the mitochondrial inner membrane                                                            | P18239 | 184.97 | 51.26% | 24 | 34.4 | 9.79 |

|                               |                                                                            |        |        |        |    |      |      |
|-------------------------------|----------------------------------------------------------------------------|--------|--------|--------|----|------|------|
| Atp1p                         | Mitochondrial F1F0 ATP synthase (respiratory complex V), alpha subunit     | P07251 | 173.98 | 39.08% | 28 | 58.6 | 9.04 |
| Atp2p                         | Mitochondrial F1F0 ATP synthase (respiratory complex V), beta subunit      | P00830 | 106.04 | 42.66% | 21 | 54.8 | 5.71 |
| Atp3p                         | Mitochondrial F1F0 ATP synthase (respiratory complex V), gamma subunit     | P38077 | 162.87 | 26.05% | 9  | 34.3 | 9.31 |
| Atp4p                         | Mitochondrial F1F0 ATP synthase (respiratory complex V), b subunit         | P05626 | 173.15 | 50.82% | 15 | 26.9 | 9.13 |
| Atp5p                         | Mitochondrial F1F0 ATP synthase (respiratory complex V), subunit 5         | P09457 | 108.74 | 48.58% | 11 | 22.8 | 9.57 |
| Atp7p                         | Mitochondrial F1F0 ATP synthase (respiratory complex V), d subunit         | P30902 | 101.36 | 58.05% | 16 | 19.8 | 8.94 |
| <b>Protein supercomplex 7</b> |                                                                            |        |        |        |    |      |      |
| Cyt1p                         | Cytochrome b-c1 complex (respiratory complex III), cytochrome c1 component | P07143 | 36.2   | 22.65% | 5  | 34   | 8.12 |
| Qcr1p                         | Cytochrome b-c1 complex (respiratory complex III), subunit 1               | P07256 | 242.73 | 39.17% | 20 | 50.2 | 7.3  |
| Qcr2p                         | Cytochrome b-c1 complex (respiratory complex III), subunit 2               | P07257 | 178.59 | 74.46% | 33 | 40.5 | 7.96 |



|        |                                                                                     |        |        |        |    |      |      |
|--------|-------------------------------------------------------------------------------------|--------|--------|--------|----|------|------|
| Qcr7p  | Cytochrome b-c1 complex (respiratory complex III), subunit 7                        | P00128 | 131.52 | 22.83% | 5  | 14.6 | 5.88 |
| Qcr8p  | Cytochrome b-c1 complex (respiratory complex III), subunit 8                        | P08525 | 26.82  | 24.47% | 4  | 11   | 9.7  |
| Rip1p  | Cytochrome b-c1 complex (respiratory complex III), ubiquinol-cytochrome-c reductase | P08067 | 77.37  | 36.28% | 10 | 23.3 | 8.07 |
| Cox4p  | Cytochrome c oxidase (respiratory complex IV), subunit 4                            | P04037 | 14.78  | 31.61% | 3  | 17.1 | 6.9  |
| Cox5Ap | Cytochrome c oxidase (respiratory complex IV), subunit 5A                           | P00424 | 160.43 | 47.71% | 11 | 17.1 | 9.82 |
| Cox5Bp | Cytochrome c oxidase (respiratory complex IV), subunit 5B                           | P00425 | 103.71 | 28.48% | 5  | 17.2 | 9.8  |
| Cox6p  | Cytochrome c oxidase (respiratory complex IV), subunit 6                            | P00427 | 26.7   | 33.11% | 8  | 17.3 | 6.05 |
| Atp1p  | Mitochondrial F1F0 ATP synthase (respiratory complex V), alpha subunit              | P07251 | 180.84 | 48.44% | 32 | 58.6 | 9.04 |
| Atp2p  | Mitochondrial F1F0 ATP synthase (respiratory complex V), beta subunit               | P00830 | 158.5  | 40.51% | 20 | 54.8 | 5.71 |
| Atp3p  | Mitochondrial F1F0 ATP synthase (respiratory complex V), gamma subunit              | P38077 | 387    | 30.55% | 10 | 34.3 | 9.31 |

|                               |                                                                            |        |        |        |    |      |      |
|-------------------------------|----------------------------------------------------------------------------|--------|--------|--------|----|------|------|
| Atp4p                         | Mitochondrial F1F0 ATP synthase (respiratory complex V), b subunit         | P05626 | 95.35  | 45.90% | 18 | 26.9 | 9.13 |
| Atp5p                         | Mitochondrial F1F0 ATP synthase (respiratory complex V), subunit 5         | P09457 | 288.43 | 66.98% | 14 | 22.8 | 9.57 |
| Atp7p                         | Mitochondrial F1F0 ATP synthase (respiratory complex V), d subunit         | P30902 | 196.03 | 44.25% | 13 | 19.8 | 8.94 |
| <b>Protein supercomplex 8</b> |                                                                            |        |        |        |    |      |      |
| Ald4p                         | Mitochondrial aldehyde dehydrogenase                                       | P46367 | 531.66 | 52.60% | 24 | 56.7 | 6.74 |
| Por1p                         | Mitochondrial porin (voltage-dependent anion channel)                      | P04840 | 114.07 | 42.05% | 11 | 30.4 | 7.93 |
| Cyt1p                         | Cytochrome b-c1 complex (respiratory complex III), cytochrome c1 component | P07143 | 32.23  | 29.77% | 6  | 34   | 8.12 |
| Qcr1p                         | Cytochrome b-c1 complex (respiratory complex III), subunit 1               | P07256 | 206.37 | 30.85% | 17 | 50.2 | 7.3  |
| Qcr2p                         | Cytochrome b-c1 complex (respiratory complex III), subunit 2               | P07257 | 152.45 | 48.10% | 21 | 40.5 | 7.96 |
| Qcr7p                         | Cytochrome b-c1 complex (respiratory complex III), subunit 7               | P00128 | 149.7  | 36.22% | 6  | 14.6 | 5.88 |
| Qcr8p                         | Cytochrome b-c1 complex (respiratory complex III), subunit 8               | P08525 | 92.45  | 24.47% | 3  | 11   | 9.7  |

|       |                                                                                     |        |        |        |    |      |      |
|-------|-------------------------------------------------------------------------------------|--------|--------|--------|----|------|------|
| Rip1p | Cytochrome b-c1 complex (respiratory complex III), ubiquinol-cytochrome-c reductase | P08067 | 36.14  | 33.95% | 7  | 23.3 | 8.07 |
| Atp1p | Mitochondrial F1F0 ATP synthase (respiratory complex V), alpha subunit              | P07251 | 666.64 | 36.15% | 27 | 58.6 | 9.04 |
| Atp2p | Mitochondrial F1F0 ATP synthase (respiratory complex V), beta subunit               | P00830 | 273.89 | 44.03% | 20 | 54.8 | 5.71 |
| Atp3p | Mitochondrial F1F0 ATP synthase (respiratory complex V), gamma subunit              | P38077 | 432.23 | 40.19% | 14 | 34.3 | 9.31 |
| Atp4p | Mitochondrial F1F0 ATP synthase (respiratory complex V), b subunit                  | P05626 | 203.16 | 47.13% | 15 | 26.9 | 9.13 |
| Atp5p | Mitochondrial F1F0 ATP synthase (respiratory complex V), subunit 5                  | P09457 | 148.55 | 49.53% | 11 | 22.8 | 9.57 |
| Atp7p | Mitochondrial F1F0 ATP synthase (respiratory complex V), d subunit                  | P30902 | 112.24 | 40.80% | 9  | 19.8 | 8.94 |
| Idh1p | Subunit of mitochondrial NAD(+)-dependent isocitrate dehydrogenase                  | P28834 | 415.06 | 47.22% | 19 | 39.3 | 9    |
| Idh2p | Subunit of mitochondrial NAD(+)-dependent isocitrate dehydrogenase                  | P28241 | 238.75 | 39.84% | 13 | 39.7 | 8.69 |

**atg32A strain****Protein supercomplex 1**

|       |                                                                                         |        |        |        |    |      |      |
|-------|-----------------------------------------------------------------------------------------|--------|--------|--------|----|------|------|
| Aac2p | Major ADP/ATP carrier of the mitochondrial inner membrane                               | P18239 | 142.9  | 31.45% | 13 | 34.4 | 9.79 |
| Por1p | Mitochondrial porin (voltage-dependent anion channel)                                   | P04840 | 135.62 | 43.46% | 12 | 30.4 | 7.93 |
| Lat1p | Dihydrolipoamide acetyltransferase component (E2) of the pyruvate dehydrogenase complex | P12695 | 71.58  | 26.97% | 14 | 51.8 | 7.8  |
| Lpd1p | Dihydrolipoamide dehydrogenase component (E3) of the pyruvate dehydrogenase complex     | P09624 | 171.86 | 37.07% | 21 | 54   | 8.03 |
| Cyt1p | Cytochrome b-c1 complex (respiratory complex III), cytochrome c1 component              | P07143 | 68.38  | 31.07% | 7  | 34   | 8.12 |
| Qcr1p | Cytochrome b-c1 complex (respiratory complex III), subunit 1                            | P07256 | 216.4  | 34.79% | 18 | 50.2 | 7.3  |
| Qcr2p | Cytochrome b-c1 complex (respiratory complex III), subunit 2                            | P07257 | 134.35 | 56.25% | 24 | 40.5 | 7.96 |
| Qcr7p | Cytochrome b-c1 complex (respiratory complex III), subunit 7                            | P00128 | 160.32 | 36.22% | 6  | 14.6 | 5.88 |
| Qcr8p | Cytochrome b-c1 complex (respiratory complex III), subunit 8                            | P08525 | 26.43  | 24.47% | 4  | 11   | 9.7  |
| Rip1p | Cytochrome b-c1 complex (respiratory complex III), ubiquinol-cytochrome-c reductase     | P08067 | 56.97  | 29.77% | 7  | 23.3 | 8.07 |

|                               |                                                                            |        |        |        |    |      |      |
|-------------------------------|----------------------------------------------------------------------------|--------|--------|--------|----|------|------|
| Atp1p                         | Mitochondrial F1F0 ATP synthase (respiratory complex V), alpha subunit     | P07251 | 293.31 | 28.26% | 21 | 58.6 | 9.04 |
| Atp2p                         | Mitochondrial F1F0 ATP synthase (respiratory complex V), beta subunit      | P00830 | 329.47 | 43.84% | 22 | 54.8 | 5.71 |
| Atp3p                         | Mitochondrial F1F0 ATP synthase (respiratory complex V), gamma subunit     | P38077 | 438.8  | 36.33% | 13 | 34.3 | 9.31 |
| Atp4p                         | Mitochondrial F1F0 ATP synthase (respiratory complex V), b subunit         | P05626 | 298.9  | 62.30% | 24 | 26.9 | 9.13 |
| Atp5p                         | Mitochondrial F1F0 ATP synthase (respiratory complex V), subunit 5         | P09457 | 573.45 | 75.47% | 16 | 22.8 | 9.57 |
| Atp7p                         | Mitochondrial F1F0 ATP synthase (respiratory complex V), d subunit         | P30902 | 190.75 | 72.99% | 15 | 19.8 | 8.94 |
| <b>Protein supercomplex 2</b> |                                                                            |        |        |        |    |      |      |
| Aac2p                         | Major ADP/ATP carrier of the mitochondrial inner membrane                  | P18239 | 167.8  | 34.91% | 14 | 34.4 | 9.79 |
| Por1p                         | Mitochondrial porin (voltage-dependent anion channel)                      | P04840 | 296.37 | 50.18% | 14 | 30.4 | 7.93 |
| Cyt1p                         | Cytochrome b-c1 complex (respiratory complex III), cytochrome c1 component | P07143 | 61.72  | 27.83% | 5  | 34   | 8.12 |
| Qcr1p                         | Cytochrome b-c1 complex (respiratory complex III), subunit 1               | P07256 | 110.93 | 39.17% | 20 | 50.2 | 7.3  |

|                               |                                                                                     |        |        |        |    |      |      |
|-------------------------------|-------------------------------------------------------------------------------------|--------|--------|--------|----|------|------|
| Qcr2p                         | Cytochrome b-c1 complex (respiratory complex III), subunit 2                        | P07257 | 152.7  | 54.08% | 24 | 40.5 | 7.96 |
| Qcr7p                         | Cytochrome b-c1 complex (respiratory complex III), subunit 7                        | P00128 | 101.24 | 36.22% | 6  | 14.6 | 5.88 |
| Qcr8p                         | Cytochrome b-c1 complex (respiratory complex III), subunit 8                        | P08525 | 13.41  | 21.28% | 2  | 11   | 9.7  |
| Rip1p                         | Cytochrome b-c1 complex (respiratory complex III), ubiquinol-cytochrome-c reductase | P08067 | 52.77  | 46.05% | 11 | 23.3 | 8.07 |
| <b>Protein supercomplex 3</b> |                                                                                     |        |        |        |    |      |      |
| Atp1p                         | Mitochondrial F1F0 ATP synthase (respiratory complex V), alpha subunit              | P07251 | 109.69 | 35.78% | 25 | 58.6 | 9.04 |
| Atp2p                         | Mitochondrial F1F0 ATP synthase (respiratory complex V), beta subunit               | P00830 | 512.23 | 38.16% | 22 | 54.8 | 5.71 |
| Atp3p                         | Mitochondrial F1F0 ATP synthase (respiratory complex V), gamma subunit              | P38077 | 156.34 | 36.33% | 12 | 34.3 | 9.31 |
| Atp4p                         | Mitochondrial F1F0 ATP synthase (respiratory complex V), b subunit                  | P05626 | 242.42 | 58.20% | 22 | 26.9 | 9.13 |
| Atp5p                         | Mitochondrial F1F0 ATP synthase (respiratory complex V), subunit 5                  | P09457 | 124.41 | 53.30% | 11 | 22.8 | 9.57 |

|                               |                                                                        |        |        |        |    |      |      |
|-------------------------------|------------------------------------------------------------------------|--------|--------|--------|----|------|------|
| Atp7p                         | Mitochondrial F1F0 ATP synthase (respiratory complex V), d subunit     | P30902 | 348.32 | 79.89% | 20 | 19.8 | 8.94 |
| <b>Protein supercomplex 4</b> |                                                                        |        |        |        |    |      |      |
| Aac2p                         | Major ADP/ATP carrier of the mitochondrial inner membrane              | P18239 | 91.45  | 33.02% | 11 | 34.4 | 9.79 |
| <b>Protein supercomplex 6</b> |                                                                        |        |        |        |    |      |      |
| Aac2p                         | Major ADP/ATP carrier of the mitochondrial inner membrane              | P18239 | 176.99 | 45.60% | 18 | 34.4 | 9.79 |
| <b>Protein supercomplex 7</b> |                                                                        |        |        |        |    |      |      |
| Atp1p                         | Mitochondrial F1F0 ATP synthase (respiratory complex V), alpha subunit | P07251 | 193.91 | 43.85% | 27 | 58.6 | 9.04 |
| Atp2p                         | Mitochondrial F1F0 ATP synthase (respiratory complex V), beta subunit  | P00830 | 102.93 | 40.12% | 17 | 54.8 | 5.71 |
| Atp3p                         | Mitochondrial F1F0 ATP synthase (respiratory complex V), gamma subunit | P38077 | 138.31 | 36.33% | 13 | 34.3 | 9.31 |
| Atp4p                         | Mitochondrial F1F0 ATP synthase (respiratory complex V), b subunit     | P05626 | 110.07 | 40.57% | 14 | 26.9 | 9.13 |
| Atp5p                         | Mitochondrial F1F0 ATP synthase (respiratory complex V), subunit 5     | P09457 | 345.82 | 82.55% | 19 | 22.8 | 9.57 |
| Atp7p                         | Mitochondrial F1F0 ATP synthase (respiratory complex V), d subunit     | P30902 | 198.09 | 83.91% | 24 | 19.8 | 8.94 |

| Protein supercomplex 8 |                                                                    |        |        |        |    |      |      |
|------------------------|--------------------------------------------------------------------|--------|--------|--------|----|------|------|
| Ald4p                  | Mitochondrial aldehyde dehydrogenase                               | P46367 | 211.93 | 51.25% | 21 | 56.7 | 6.74 |
| Por1p                  | Mitochondrial porin (voltage-dependent anion channel)              | P04840 | 141.79 | 40.64% | 10 | 30.4 | 7.93 |
| Idh1p                  | Subunit of mitochondrial NAD(+)-dependent isocitrate dehydrogenase | P28834 | 367.21 | 43.06% | 16 | 39.3 | 9    |
| Idh2p                  | Subunit of mitochondrial NAD(+)-dependent isocitrate dehydrogenase | P28241 | 580.69 | 40.65% | 14 | 39.7 | 8.69 |
